# Supplementary material for: Determination of Nine Fentanyl and Six Amphetamine Drugs in Hair Samples by GC-MS/MS and LC-MS/MS
Source: Preprints.org preprint supplement (doi:10.20944/preprints202409.0194.v1), 2024-09-03
Supplement: Supplementary file 1 [file supplementary]

Table S1 Experimental sample information table

| Drug name                   | Molecular formula     | Molecular weight | CAS          |
|-----------------------------|-----------------------|------------------|--------------|
| Norfentanyl                 | $C_{14}H_{20}N_2O$    | 232.32           | 1609-66-1    |
| Acetylfentanyl              | $C_{21}H_{26}N_2O$    | 322.45           | 3258-84-2    |
| Isobutyryl fentanyl         | $C_{23}H_{30}N_2O$    | 350.51           | 119618-70-1  |
| P-Fluorofentanyl            | $C_{22}H_{27}FN_2O$   | 354.47           | 90736-23-5   |
| Ocfentanyl                  | $C_{22}H_{27}FN_2O_2$ | 370.47           | 101343-69-5  |
| Thiofentanyl                | $C_{20}H_{26}N_2OS$   | 342.50           | 1165-22-6    |
| 4-fluoroisobutyryl fentanyl | $C_{23}H_{29}FN_2O$   | 368.50           | 244195-32-2  |
| Tetrahydrofuran fentanyl    | $C_{24}H_{30}N_2O_2$  | 378.52           | 2142571-01-3 |
| Fentanyl                    | $C_{22}H_{28}N_2O$    | 336.48           | 437-38-7     |
| AP                          | $C_9H_{13}N$          | 135.21           | 300-62-9     |
| MA                          | $C_{10}H_{15}N$       | 149.23           | 537-46-2     |
| MDEA                        | $C_{12}H_{17}NO_2$    | 207.27           | 82801-81-8   |
| MDMA                        | $C_{11}H_{15}NO_2$    | 193.24           | 42542-10-9   |
| MDA                         | $C_{10}H_{13}NO_2$    | 179.22           | 4764-17-4    |
| Ephedrine                   | $C_{10}H_{15}NO$      | 165.12           | 299-42-3     |

Table S2 Information of instruments

| Instrument name             | Model        | Manufacturer                    |
|-----------------------------|--------------|---------------------------------|
| LC-MS/MS                    | TQS          | Waters, The United States       |
| GC-MS/MS                    | 7890A-7000   | Agilent, The United States      |
| Ultrasound machine          | Branson 8510 | Danbury, The United States      |
| Nitrogen blowing instrument | N-EVAP 112   | Organomation, The United States |
| Pure water machine          | Milli-Q      | Millipore, The United States    |
| Centrifuge                  | CF16RXII     | HITACHI, Japan                  |
| Electronic balance          | XP205        | Mettler<br>Toledo, Switzerland  |

Table S3 Laboratory reagent information sheet

| Reagent name       | Purity                 | Manufacturer                                  |
|--------------------|------------------------|-----------------------------------------------|
| Methanol           | Chromatographic purity | Merck KGaA, Germany                           |
| Acetonitrile       | Chromatographic purity | Merck KGaA, Germany                           |
| Dimethyl sulfoxide | >99.5%                 | Honeywell, The United States                  |
| Hydrochloric acid  | Analytical purity      | Beijing Institute of Chemical Reagents, China |
| Formic acid        | Chromatographic purity | Honeywell, The United States                  |
| Ammonium acetate   | Chromatographic purity | Honeywell, The United States                  |

Table S4 Gradient elution program table

| Time(min) | A(%) | B(%) |
|-----------|------|------|
| 0.0       | 85   | 15   |
| 4.0       | 72   | 28   |
| 5.0       | 72   | 28   |
| 10.0      | 70   | 30   |
| 13.0      | 55   | 45   |
| 13.5      | 5    | 95   |
| 14.5      | 85   | 15   |
| 20.0      | 85   | 15   |

Table S5 Mass spectrometry parameters of fentanyl and amphetamines in LC-MS/MS

| Drug name                  | Molecular weight | Parent ion (m/z) | Daughter ion (m/z) | Cone (V) | CE (V) |
|----------------------------|------------------|------------------|--------------------|----------|--------|
| Norfentanyl                | 232.32           | 233.25           | 84.25*             | 82       | 18     |
| Acetylfentanyl             | 322.45           | 323.31           | 188.29*            | 10       | 20     |
|                            |                  |                  | 105.23             | 10       | 32     |
| Ocfentanyl                 | 370.47           | 371.33           | 188.29*            | 10       | 24     |
|                            |                  |                  | 105.23             | 10       | 34     |
| Thiofentanyl               | 342.50           | 343.23           | 194.27*            | 16       | 20     |
|                            |                  |                  | 111.21             | 16       | 46     |
| Fentanyl                   | 336.48           | 337.34           | 188.29*            | 4        | 20     |
|                            |                  |                  | 105.23             | 4        | 34     |
| P-Fluorofentanyl           | 354.47           | 355.33           | 188.29*            | 8        | 26     |
|                            |                  |                  | 105.23             | 8        | 34     |
| Isobutyryl fentanyl        | 350.51           | 351.37           | 188.29*            | 16       | 24     |
|                            |                  |                  | 105.23             | 16       | 34     |
| 4-fluoroisobutyrylfentanyl | 368.50           | 369.36           | 188.29*            | 6        | 24     |
|                            |                  |                  | 105.23             | 6        | 36     |
| Tetrahydrofuranylfentanyl  | 378.52           | 379.29           | 188.29*            | 94       | 38     |
|                            |                  |                  | 105.23             | 94       | 22     |
| AP                         | 135.00           | 137.10           | 92.15*             | 55       | 25     |
|                            |                  |                  | 119.00             | 55       | 15     |
| MA                         | 149.23           | 148.24           | 133.24*            | 64       | 18     |
|                            |                  |                  | 117.26             | 64       | 16     |
| MDEA                       | 207.00           | 208.22           | 105.23*            | 28       | 22     |
|                            |                  |                  | 132.85             | 28       | 24     |
| MDMA                       | 194.00           | 194.22           | 163.27*            | 32       | 12     |
|                            |                  |                  | 105.23             | 32       | 22     |
| MDA                        | 179.20           | 181.10           | 135.00             | 70       | 26     |
|                            |                  |                  | 164.20*            | 70       | 13     |
| Ephedrine                  | 148.00           | 148.16           | 114.91             | 42       | 16     |
|                            |                  |                  | 133.24*            | 42       | 16     |
| MA-D5                      | 154.23           | 155.17           | 92.11              | 20       | 4      |
|                            |                  |                  | 114.14*            | 10       | 4      |

Table S6 Retention times and characteristic ions of fentanyl and amphetamines in GC-MS/MS

| Drug name                   | Characteristic ions | RT(min) |
|-----------------------------|---------------------|---------|
| AP                          | 44*,91,117,65       | -       |
| MA                          | 58*,91,56           | 6.40    |
| MDEA                        | 72*,135,136,77      | 11.57   |
| MDMA                        | 58*,77,59,135       | 11.01   |
| MDA                         | 44*,136,77,51       | 10.37   |
| Ephedrine                   | 58*,77,105          | 9.12    |
| MA-D5                       | 62*,66,92,139       | 6.37    |
| Norfentanyl                 | 120,159,175,83*     | 15.89   |
| Acetylfentanyl              | 231*,146,188        | 23.28   |
| Isobutyryl fentanyl         | 259*,146,189        | 23.64   |
| P-Fluorofentanyl            | 263*,164,220        | 23.45   |
| Ocfentanyl                  | 279*,176,280        | 24.53   |
| Thiofentanyl                | 245*,146,93         | 23.91   |
| 4-fluoroisobutyryl fentanyl | 277,164*,207        | 24.05   |
| Tetrahydrofuran fentanyl    | 287*,189,146,158    | 26.98   |
| Fentanyl                    | 245*,146,189,280    | 23.79   |

\*: quantitative ion

-: not detected

Table S7 Linearity and range of 15 drugs

| Drug name                  | GC-MS/MS                             |                     |        | LC-MS/MS                             |                     |        |
|----------------------------|--------------------------------------|---------------------|--------|--------------------------------------|---------------------|--------|
|                            | Linear range/<br>ng·mg <sup>-1</sup> | Regression equation | r      | Linear range/<br>ng·mg <sup>-1</sup> | Regression equation | r      |
| Norfentanyl                | 0.4-4.5                              | y=0.1311x+0.1568    | 0.9998 | 0.01-0.2                             | y=21.173x+0.1193    | 0.9997 |
| Acetylfentanyl             | 0.9-4.5                              | y=0.2019x+0.3706    | 0.9996 | 0.01-0.2                             | y=61.131x+0.3503    | 0.9996 |
| Isobutyryl fentanyl        | 0.4-4.5                              | y=0.27x+0.6094      | 0.9997 | 0.01-0.2                             | y=51.327x+1.2441    | 0.9996 |
| P-Fluorofentanyl           | 0.4-4.5                              | y=0.2233x+0.4528    | 0.9996 | 0.01-0.2                             | y=71.813x+0.0265    | 0.9995 |
| Ocfentanyl                 | 0.4-4.5                              | y=0.2182x+0.4271    | 0.9997 | 0.01-0.2                             | y=84.916x+0.462     | 0.9995 |
| Thiofentanyl               | 0.4-4.5                              | y=0.175x+0.4698     | 0.9996 | 0.01-0.2                             | y=45.938x+0.1992    | 0.9995 |
| 4-fluoroisobutyrylfentanyl | 0.4-4.5                              | y=0.1424x+0.3142    | 0.9997 | 0.01-0.2                             | y=16.077x+3.8265    | 0.9998 |
| Tetrahydrofuranylfentanyl  | 0.9-4.5                              | y=0.1195x+0.2369    | 0.9995 | 0.01-0.2                             | y=31.942x+0.0672    | 0.9997 |
| Fentanyl                   | 0.4-4.5                              | y=0.1425x+0.3061    | 0.9996 | 0.01-0.2                             | y=56.917x+0.1109    | 0.9999 |
| AP                         | 0.9-4.3                              | y=0.5144x+0.9685    | 0.9996 | 0.06-0.5                             | y=0.1779x+0.0163    | 0.9995 |
| MA                         | 0.9-4.5                              | y=1.0571x+1.0671    | 0.9998 | 0.01-0.2                             | y=7.689x-0.0435     | 0.9997 |
| MDEA                       | 0.9-4.4                              | y=1.056x+4.1112     | 0.9996 | 0.01-0.2                             | y=23.794x+0.1312    | 0.9996 |
| MDMA                       | 0.9-4.4                              | y=0.6487x+2.0984    | 0.9995 | 0.01-0.2                             | y=38.361x+0.12      | 0.9998 |
| Ephedrine                  | 0.9-4.4                              | y=0.604x+0.8299     | 0.9997 | 0.01-0.2                             | y=10.336x-0.0034    | 0.9999 |
| MDA                        | 0.9-4.4                              | y=0.3614x+0.5927    | 0.9997 | 0.06-0.5                             | y=0.0566+0.0062     | 0.9996 |

Table S8 Repeatability results of 15 drugs

| Drug name | GC-MS/MS | LC-MS/MS |
|-----------|----------|----------|
|-----------|----------|----------|

|                           | ME/%          |               | ME/%          |               |
|---------------------------|---------------|---------------|---------------|---------------|
|                           | Intraday(n=6) | Daytime(n=30) | Intraday(n=6) | Daytime(n=30) |
| Norfentanyl               | 5.1           | 6.7           | 1.9           | 2.6           |
| Acetylfentanyl            | 3.6           | 8.0           | 1.2           | 1.4           |
| Isobutyryl fentanyl       | 4.0           | 6.8           | 1.2           | 1.5           |
| P-Fluorofentanyl          | 3.5           | 7.5           | 1.0           | 1.6           |
| Ocfentanyl                | 5.1           | 7.7           | 1.2           | 1.6           |
| Thiofentanyl              | 2.5           | 7.9           | 0.9           | 1.4           |
| 4-fluoroisobutyrfentanyl  | 2.7           | 8.1           | 1.1           | 1.6           |
| Tetrahydrofuranylfentanyl | 3.6           | 9.3           | 1.2           | 2.1           |
| Fentanyl                  | 2.7           | 9.6           | 1.0           | 2.1           |
| AP                        | -             | -             | -             | -             |
| MA                        | 2.1           | 3.8           | 3.1           | 5.1           |
| MDEA                      | 1.3           | 2.1           | 1.6           | 2.7           |
| MDMA                      | 1.5           | 3.3           | 1.2           | 1.5           |
| Ephedrine                 | 2.9           | 8.8           | 1.4           | 3.6           |
| MDA                       | 1.6           | 5.8           | 2.6           | 5.0           |

Table S9 Stability test results of 15 drugs

| Drug name | GC-MS/MS | LC-MS/MS |
|-----------|----------|----------|
|-----------|----------|----------|

|                            | Stability/% |      |      |      |      | Stability/% |      |      |      |      |
|----------------------------|-------------|------|------|------|------|-------------|------|------|------|------|
|                            | 1 h         | 24 h | 48 h | 72 h | 96 h | 1 h         | 24 h | 48 h | 72 h | 96 h |
| Norfentanyl                | 5.1         | 4.7  | 5.3  | 6.3  | 6.7  | 1.9         | 1.8  | 2.9  | 2.7  | 2.6  |
| Acetylfentanyl             | 3.6         | 4.4  | 4.5  | 5.4  | 8.0  | 1.2         | 1.3  | 1.4  | 1.5  | 1.4  |
| Isobutyryl fentanyl        | 4.0         | 4.5  | 4.6  | 4.8  | 6.8  | 1.2         | 1.5  | 1.4  | 1.5  | 1.5  |
| P-Fluorofentanyl           | 3.5         | 7.9  | 6.9  | 6.3  | 7.5  | 1.0         | 1.2  | 1.2  | 1.6  | 1.6  |
| Ocfentanyl                 | 5.1         | 6.1  | 6.4  | 6.9  | 7.7  | 1.2         | 1.7  | 1.6  | 1.7  | 1.6  |
| Thiofentanyl               | 2.5         | 6.4  | 5.9  | 6.1  | 7.9  | 0.9         | 1.0  | 1.0  | 1.3  | 1.4  |
| 4-fluoroisobutyrylfentanyl | 2.7         | 6.3  | 6.8  | 6.8  | 8.1  | 1.1         | 1.8  | 1.5  | 1.6  | 1.6  |
| Tetrahydrofuranylfentanyl  | 3.6         | 5.6  | 5.8  | 7.4  | 9.3  | 1.2         | 2.3  | 2.2  | 2.2  | 2.1  |
| Fentanyl                   | 2.7         | 6.1  | 5.8  | 5.7  | 9.6  | 1.0         | 1.3  | 1.7  | 2.1  | 2.1  |
| AP                         | -           | -    | -    | -    | -    | -           | -    | -    | -    | -    |
| MA                         | 2.1         | 2.6  | 2.8  | 3.3  | 3.8  | 3.1         | 3.6  | 4.0  | 4.3  | 5.1  |
| MDEA                       | 1.3         | 1.8  | 2.1  | 2.0  | 2.1  | 1.6         | 1.5  | 2.4  | 2.6  | 2.7  |
| MDMA                       | 1.5         | 1.8  | 2.3  | 2.6  | 3.3  | 1.2         | 1.0  | 1.5  | 1.5  | 1.5  |
| Ephedrine                  | 2.9         | 5.2  | 6.0  | 6.6  | 8.8  | 1.4         | 2.4  | 2.7  | 3.1  | 3.6  |
| MDA                        | 1.6         | 1.7  | 3.0  | 4.1  | 5.8  | 2.6         | 5.3  | 4.9  | 5.3  | 5.0  |

Table S10 Recovery and matrix effect of 15 drugs

| Drug name | GC-MS/MS | LC-MS/MS |
|-----------|----------|----------|
|-----------|----------|----------|

|                            | Recovery<br>/% | RSD/<br>% | ME/<br>% | RSD/<br>% | Recovery<br>/% | RSD/<br>% | ME/<br>% | RSD/<br>% |
|----------------------------|----------------|-----------|----------|-----------|----------------|-----------|----------|-----------|
|                            | 91.32          | 2.7       | 105.3    | 14.6      | 98.08          | 0.8       | 98.70    | 1.5       |
| Norfentanyl                | 98.24          | 2.8       | 111.8    | 0.7       | 98.88          | 1.6       | 98.50    | 1.6       |
|                            | 93.04          | 3.0       | 102.3    | 5.6       | 99.04          | 0.4       | 98.80    | 0.8       |
| Acetylfentanyl             | 92.62          | 2.2       | 94.40    | 10.1      | 97.71          | 1.2       | 99.10    | 1.1       |
|                            | 85.50          | 7.4       | 86.40    | 2.3       | 98.83          | 0.7       | 98.40    | 1.0       |
|                            | 92.74          | 6.9       | 98.20    | 0.8       | 93.94          | 0.7       | 93.50    | 1.2       |
|                            | 104.1          | 2.8       | 95.10    | 8.6       | 98.69          | 0.5       | 101.0    | 0.9       |
| Isobutyryl fentanyl        | 90.25          | 4.1       | 88.30    | 4.3       | 98.39          | 0.8       | 97.90    | 0.9       |
|                            | 98.82          | 7.9       | 100.9    | 1.0       | 97.89          | 0.4       | 98.40    | 0.5       |
|                            | 95.63          | 2.6       | 95.00    | 4.9       | 99.21          | 1.9       | 100.2    | 1.6       |
| P-Fluorofentanyl           | 102.1          | 7.9       | 86.90    | 3.4       | 99.34          | 1.4       | 98.90    | 1.2       |
|                            | 95.90          | 8.6       | 99.20    | 3.4       | 98.71          | 0.7       | 99.40    | 0.9       |
|                            | 89.92          | 2.3       | 99.50    | 10.1      | 98.40          | 1.5       | 99.60    | 1.4       |
| Ocfentanyl                 | 99.59          | 6.0       | 83.80    | 1.5       | 97.77          | 1.2       | 97.80    | 1.4       |
|                            | 96.61          | 3.4       | 96.60    | 3.4       | 99.12          | 1.1       | 99.10    | 1.0       |
|                            | 94.31          | 2.5       | 109.1    | 5.7       | 101.2          | 7.4       | 101.3    | 5.3       |
| Thiofentanyl               | 97.56          | 2.5       | 85.60    | 2.5       | 99.09          | 1.1       | 100.7    | 1.1       |
|                            | 97.44          | 2.6       | 96.10    | 2.6       | 99.77          | 0.3       | 100.8    | 0.9       |
| 4-fluoroisobutyrylfentanyl | 96.56          | 1.6       | 99.70    | 4.5       | 98.02          | 2.3       | 99.80    | 2.1       |
|                            | 88.57          | 8.5       | 86.50    | 4.2       | 97.87          | 1.2       | 97.50    | 1.3       |
|                            | 101.5          | 7.1       | 96.00    | 1.5       | 98.19          | 0.4       | 98.80    | 0.9       |
| Tetrahydrofuranlylfentanyl | 92.42          | 3.6       | 86.40    | 8.6       | 97.90          | 1.7       | 99.20    | 1.4       |
|                            | 99.59          | 1.9       | 86.80    | 1.5       | 96.70          | 0.7       | 96.30    | 1.4       |
|                            | 103.9          | 5.8       | 91.50    | 3.9       | 100.7          | 0.8       | 99.60    | 1.1       |
| Fentanyl                   | 92.43          | 1.9       | 105.7    | 7.6       | 96.04          | 0.8       | 99.50    | 0.9       |
|                            | 97.84          | 5.9       | 114.9    | 2.2       | 98.72          | 1.2       | 98.40    | 1.1       |
|                            | 112.9          | 2.3       | 94.20    | 3.0       | 98.45          | 0.3       | 99.10    | 1.0       |
| AP                         | 95.83          | 6.0       | 102.3    | 1.7       | 102.3          | 1.8       | 91.80    | 6.3       |
|                            | 89.42          | 1.9       | 96.70    | 1.5       | 84.46          | 0.9       | 86.30    | 2.8       |
|                            | 104.0          | 1.3       | 108.1    | 1.5       | 88.69          | 4.4       | 87.10    | 4.6       |
| MA                         | 87.66          | 1.1       | 101.8    | 6.1       | 110.8          | 10.2      | 109.0    | 7.4       |
|                            | 89.69          | 2.3       | 115.9    | 10.3      | 104.3          | 2.8       | 103.2    | 3.6       |
|                            | 86.14          | 4.0       | 101.7    | 6.2       | 100.6          | 1.4       | 100.3    | 2.2       |
| MDEA                       | 91.13          | 1.4       | 97.10    | 8.9       | 97.41          | 2.2       | 99.10    | 1.5       |
|                            | 91.30          | 6.9       | 90.80    | 1.3       | 98.70          | 1.0       | 98.90    | 1.0       |
|                            | 106.3          | 7.5       | 103.9    | 3.0       | 98.78          | 0.2       | 99.70    | 0.6       |
| MDMA                       | 97.20          | 7.2       | 102.7    | 8.0       | 98.67          | 2.3       | 99.70    | 1.5       |
|                            | 90.90          | 1.8       | 96.80    | 2.2       | 100.2          | 0.8       | 99.40    | 0.7       |
|                            | 112.8          | 3.5       | 108.3    | 1.9       | 98.70          | 0.4       | 99.00    | 0.5       |
| Ephedrine                  | 86.84          | 2.2       | 108.5    | 13.2      | 106.6          | 1.9       | 103.4    | 2.6       |
|                            | 90.88          | 1.4       | 88.30    | 4.2       | 104.1          | 0.3       | 103.7    | 1.6       |
|                            | 105.6          | 3.2       | 89.40    | 2.3       | 100.3          | 1.2       | 100.5    | 1.1       |

|     |       |     |       |      |       |     |       |     |
|-----|-------|-----|-------|------|-------|-----|-------|-----|
|     | 116.4 | 6.1 | 93.90 | 12.8 | 97.52 | 6.7 | 97.10 | 5.7 |
| MDA | 89.68 | 3.1 | 101.7 | 5.5  | 104.2 | 5.0 | 99.50 | 3.7 |
|     | 92.11 | 1.7 | 109.4 | 1.4  | 90.00 | 3.7 | 90.50 | 3.2 |

Table S11 Comparison of GC-MS/MS and LC-MS/MS results (ng/mg)

| Drug name | LC-MS/MS | GC-MS/MS | ME/% | Mean |
|-----------|----------|----------|------|------|
|-----------|----------|----------|------|------|

|                            | Mean  | RSD/% | Mean  | RSD/% |       |       |
|----------------------------|-------|-------|-------|-------|-------|-------|
| Norfentanyl                | 1.012 | 1.6   | 1.087 | 3.7   | -3.8  | 1.050 |
| Acetylfentanyl             | 4.788 | 0.6   | 4.821 | 2.0   | -1.6  | 4.805 |
| Isobutyryl fentanyl        | 4.826 | 0.3   | 4.816 | 1.9   | 0.5   | 4.821 |
| P-Fluorofentanyl           | 5.830 | 0.2   | 5.786 | 1.6   | 2.2   | 5.808 |
| Ocfentanyl                 | 3.188 | 1.1   | 3.031 | 2.2   | 7.9   | 3.110 |
| Thiofentanyl               | 5.010 | 0.6   | 4.925 | 2.0   | 4.3   | 4.968 |
| 4-fluoroisobutyrylfentanyl | 6.303 | 0.4   | 6.028 | 1.7   | 13.8  | 6.166 |
| Tetrahydrofuranylfentanyl  | 3.444 | 0.2   | 3.451 | 3.0   | -0.3  | 3.448 |
| Fentanyl                   | 7.830 | 0.3   | 7.712 | 1.9   | 5.9   | 7.771 |
| AP                         | -     | -     | -     | -     | -     | -     |
| MA                         | 1.789 | 1.3   | 2.015 | 2.0   | -11.3 | 1.902 |
| MDEA                       | 1.321 | 0.3   | 1.322 | 1.2   | -0.05 | 1.322 |
| MDMA                       | 3.284 | 0.7   | 3.325 | 1.2   | -2.1  | 3.305 |
| Ephedrine                  | 1.667 | 1.3   | 1.667 | 1.6   | -0.02 | 1.667 |
| MDA                        | 1.938 | 1.6   | 2.112 | 2.7   | -8.7  | 2.025 |
